# Supplementary material for: Spatio-Temporal Expression Pattern of Ki-67, pRB, MMP-9 and Bax in Human Secondary Palate Development
Source: MDPI journal article supplement (doi:10.3390/life11020164), 2021-02-20
Supplement: s1 [file s1]

Article

# Spatio-temporal Expression Pattern of Ki-67, pRb, MMP-9 and Bax in Human Secondary Palates Development

Tanja Šimić Bilandžija <sup>1,†</sup>, Katarina Vukojević <sup>2,3,†</sup>, Anka Ćorić <sup>4</sup>, Ivna Vuković Kekez <sup>5</sup>, Ivana Medvedec Mikić <sup>6</sup>, Lidija Lasić Arapović <sup>4</sup>, Natalija Filipović <sup>2</sup>, Jasminka Anđelić <sup>7</sup>, Mirna Saraga-Babić <sup>2</sup> and Danijela Kalibović Govorko <sup>5,\*</sup>

## Supplementary Materials:

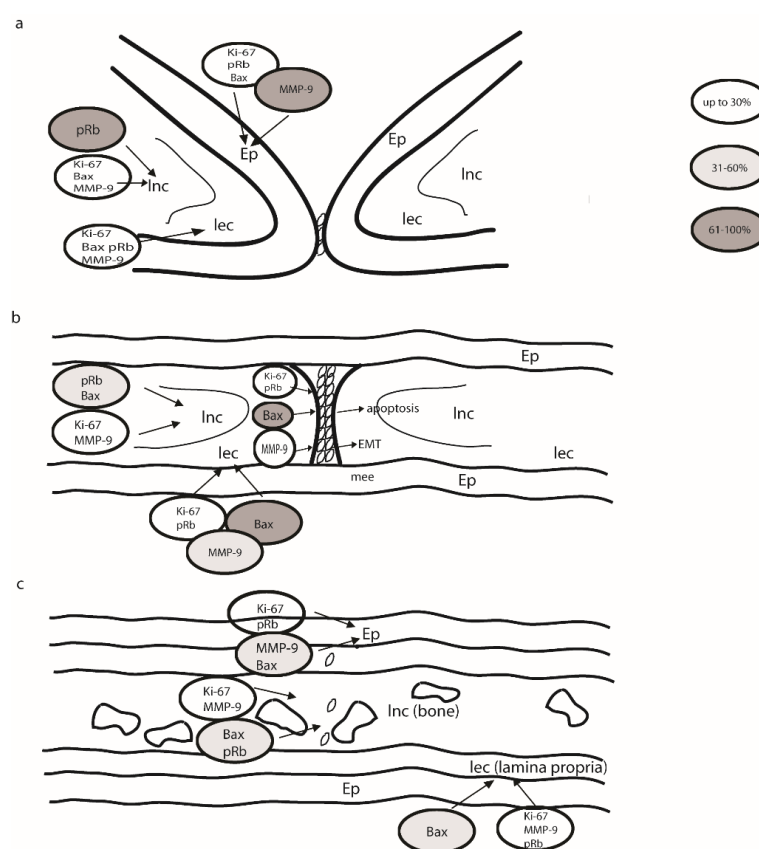

**Supplementary S1.** Schematic drawing of different developmental stages of secondary palate and percentage of Ki-67, pRb, Bax and MMP-9 positive cells in the 7th week (a), 9th week (b) and 12th week (c) of human conceptuses: epithelium (Ep), loose ectomesenchyme condensations (lec), loose non-condensing ectomesenchyme (Inc), medial edge epithelium (mee).
